22 **Abstract:**

23 Infections caused by the opportunistic pathogen *Mycobacterium abscessus* are increasing in  
24 prevalence within the cystic fibrosis population. Our limited understanding of this ubiquitous  
25 environmental microorganism matched with its intrinsic resistance to most classes of antibiotic,  
26 including  $\beta$ -lactams, has left us with an urgent demand for new, more effective therapeutic  
27 interventions. *De novo* antimicrobial drug discovery is a lengthy process and so we have taken the  
28 approach of repurposing known antibiotics in order to provide a rapidly implementable solution to a  
29 current problem. Here we report a significant step forward in treatment potential for *M. abscessus*  
30 infection by sensitising the organism to the broad spectrum  $\beta$ -lactam antibiotic, amoxicillin, using the  
31 non-competitive  $\beta$ -lactamase inhibitor, relebactam. We demonstrate by disk diffusion and broth  
32 microdilution assay that this combination works synergistically to inhibit *M. abscessus*. We also  
33 demonstrate the direct non-competitive inhibition of the *M. abscessus*  $\beta$ -lactamase, Bla<sub>Mab</sub> using a  
34 novel thin-layer chromatography-based assay for  $\beta$ -lactamase inhibition, which is subsequently  
35 kinetically validated by spectrophotometric assay using the nitrocefin reporter assay. Finally, we  
36 demonstrate the *in vitro* efficacy of this combination against a collection of *M. abscessus* clinical  
37 isolates, demonstrating the significant therapeutic potential of the amoxicillin and relebactam  
38 combination.

39

40 **Introduction:**

41 The incidence of infections with the rapidly growing non-tuberculous mycobacterial (NTM) organism  
42 *Mycobacterium abscessus* is increasing due to the increase of immunocompromised individuals  
43 (Petrini, et al. 2006) (Griffith, et al. 2014). *M. abscessus* is widely responsible for opportunistic  
44 pulmonary infections in patients with structural lung disorders such as cystic fibrosis (CF) and  
45 bronchiectasis (Griffith, et al., 2007) as well as skin and soft tissue infections (SSTIs) in humans (Moore,  
46 1953) (Fitzgerald, et al., 1995). The ubiquitous environmental nature of *M. abscessus* may go some

47 way to explaining the high levels of intrinsic drug resistance to most major classes of antibiotic that is  
48 observed clinically (Nessar, et al. 2012). Recently, macrolides were added to the ever growing list of  
49 ineffective antimicrobial agents for *M. abscessus* infection, exemplifying the urgent need for new ways  
50 to treat this infection (Nessar, et al. 2012). Additionally, *M. abscessus* is resistant to two of the  
51 frontline antibiotics used for tuberculosis treatment; rifampicin and ethambutol (Nessar, et al. 2012),  
52 and many of the new drugs being discovered for treating tuberculosis do not exhibit any antimicrobial  
53 activity against *M. abscessus* (Soni, et al. 2016).

54

55 Pulmonary *M. abscessus* disease was historically treated with macrolide antibiotics such as  
56 clarithromycin (Griffith, et al., 2007), however the steady emergence of antibiotic resistant strains has  
57 prompted the implementation of combination therapy using azithromycin (macrolide) along with  
58 amikacin (aminoglycoside) and at least one other drug of a different class (Leung, et al. 2013). The  
59 British Thoracic Society recommends a biphasic treatment for pulmonary *M. abscessus* infection  
60 comprising of a 1-month initiation phase including intravenously administered amikacin, tigecycline  
61 and imipenem, supplemented with oral clarithromycin or azithromycin (depending on sensitivity  
62 results). This is followed by a 12-month continuation phase comprising of nebulised amikacin, and a  
63 combination of 1-4 of clofazimine, linezolid, minocycline, moxifloxacin or co-trimoxazole (Lopeman et  
64 al. 2019) (Haworth et al 2017).

65

66 The advancements in whole genome sequencing technology have enabled the identification of three  
67 distinct subspecies within the *M. abscessus* complex, comprising *M. abscessus* subsp. *abscessus*, *M.*  
68 *abscessus* subsp. *bolletii*, and *M. abscessus* subsp. *massiliense*, the latter of which contains a non-  
69 functional *erm(41)* gene, resulting in a macrolide sensitive phenotype (Bryant et al. 2013) (Tortoli et  
70 al. 2016). Mutations in *rrs* and *rrl* 16S rRNA genes have been identified corresponding to high levels of  
71 aminoglycoside resistance, prohibiting the effective use of amikacin in treatment for *M. abscessus*

72 subsp. *abscessus* and *M. abscessus* subsp. *massiliense* clinical isolates specifically (Kehrmann et al.  
73 2016). All *M. abscessus* subsp. contain an endogenous class A  $\beta$ -lactamase (Bla<sub>Mab</sub>) conveying intrinsic  
74 resistance to the  $\beta$ -lactam antibiotics (Soroka et al 2014). The identification of Bla<sub>Mab</sub>, a homolog of  
75 the *Mycobacterium tuberculosis* endogenous  $\beta$ -lactamase, BlaC, sparked widespread investigation  
76 into the potential of  $\beta$ -lactamase inhibitors to supplement the treatment of *M. abscessus* infection. A  
77 study demonstrated the inhibitory activity of avibactam, a non- $\beta$ -lactam  $\beta$ -lactamase inhibitor,  
78 against Bla<sub>Mab</sub> significantly improving the *in vitro* and *in vivo* activity of imipenem (Lefebvre et al. 2016).  
79 Very recently, a number of studies have been published demonstrating a number of  $\beta$ -lactam  
80 combinations displaying high levels of *in vitro* synergistic activity against *M. abscessus* complex  
81 (Pandey et al 2019) (Story-Roller et al. 2019). Furthermore, a recent study identified the *in vitro* activity  
82 of two new non- $\beta$ -lactam  $\beta$ -lactamase inhibitors, namely relebactam and vaborbactam,  
83 demonstrating synergistic activity between imipenem and relebactam as well as meropenem and  
84 vaborbactam (Kaushik et al. 2019).

85

86 In this study, we have built on previous work and identified a significant step forward in treatment  
87 potential for *M. abscessus* infection. We have demonstrated the *in vitro* capacity for sensitising the  
88 organism to the broad spectrum  $\beta$ -lactam antibiotic, amoxicillin, using the non-competitive  $\beta$ -  
89 lactamase inhibitor, relebactam. We have demonstrated direct, non-competitive inhibition of  
90 recombinant Bla<sub>Mab</sub> by relebactam, and demonstrated synergy between amoxicillin and relebactam as  
91 well as activity against a range of clinical isolates. This offers a considerable therapeutic potential as  
92 imipenem, a mainstay of current *M. abscessus* treatment, is currently undergoing phase III clinical trial  
93 in combination with relebactam, suggesting the simple addition of amoxicillin and relebactam to the  
94 treatment regime has the potential to significantly improve the treatment outcome.

95

96

97 **Materials and Methods:**

98

99 **Bacterial isolates**

100 A total of 16 *M. abscessus* clinical isolates from Brighton and Sussex Medical School and *M. abscessus*  
101 NCTC 13031 were used in this study. Stock solutions of the isolates were kept in 50% glycerol (Sigma,  
102 Dorset, UK) and Middlebrook 7H9 Broth and stored at -80 °C. Isolates were grown in Middlebrook 7H9  
103 medium supplemented with 10% oleic acid-dextrose-catalase (OADC), 1% glycerol (50% w/v) and  
104 0.05% Tween 80 (v/v) prior to testing. *Escherichia coli* Top 10 cells were used for propagation of  
105 plasmid DNA. These cells were routinely grown in nutrient broth, or nutrient agar (Oxoid, UK) at 37  
106 °C. *E. coli* BL21 (DE3) cells were used for the overproduction of recombinant protein, grown in Terrific  
107 Broth (Melford, UK) at 37 °C.

108

109 **Antimicrobials**

110 The antimicrobial agents meropenem (MEM), amoxicillin (AMX) and phenoxymethylpenicillin  
111 (Penicillin V/PenV) were obtained from Sigma Aldrich (Dorset, UK) and relebactam was obtained from  
112 Carbosynth (Compton, UK). Stock solutions were prepared in sterile de-ionised water and stored at -  
113 20 °C until use.

114

115 **Disk diffusions**

116 For the disk diffusion assays, *M. abscessus* clinical isolates were grown in Middlebrook 7H9 Broth to  
117 logarithmic phase and 100 µL of bacterial culture was inoculated into 10 mL Middlebrook 7H9 Broth  
118 supplemented with 0.7% bacteriological agar. This was poured as a layer in agar plates on top of 15  
119 mL Middlebrook 7H11 Agar supplemented with 10% OADC and 1% glycerol. 6 mm sterile filter paper

120 diffusion disks were placed on the agar and were subsequently impregnated with antibiotic at the  
121 following concentrations in sterile distilled water: relebactam 1  $\mu$ L of 10 mg/mL, amoxicillin 3.3  $\mu$ L of  
122 3 mg/mL and meropenem 1  $\mu$ L of 10 mg/mL. Plates were incubated at 30 °C for 5 days or until clear  
123 zones of inhibition were visualised. Zones of inhibition were measured across the diameter to include  
124 the disk itself.

125

### 126 **Broth microdilution assay**

127 The broth microdilution assay was performed as described previously with alterations appropriate to  
128 this study (Institute, Clinican and Laboratory Standards 2012) (Caleffi-Ferracioli et al. 2013). Plates  
129 were prepared by serially diluting AMX (0.128 mg/mL – 0 mg/mL) or MEM (0.128 mg/mL – 0 mg/mL)  
130 in the x-axis and REL (0.128 mg/mL – 0 mg/mL) in the y-axis. 80  $\mu$ L of *Mycobacterium abscessus* NCTC  
131 13031 suspension adjusted to an OD<sub>600</sub> of 0.1-0.2 was inoculated in each well to reach a final well  
132 volume of 100  $\mu$ L. Plates were sealed and incubated at 30 °C for 5 days or until positive control wells  
133 reached an OD<sub>600</sub> of 1.0. The MIC of amoxicillin/relebactam combination was determined by  
134 visualising the well that had the lowest concentrations of both compounds and exhibited no bacterial  
135 growth. The relevant well was retroactively plotted into a growth curve over time, and this growth  
136 curve was compared to the wells containing no drug, and the wells containing relebactam only and  
137 amoxicillin only.

138

### 139 **Expression and purification of recombinant Bla<sub>Mab</sub>**

140 The *bla<sub>Mab</sub>* gene (MAB\_2875) from *Mycobacterium abscessus* NCTC 13031 was amplified by  
141 polymerase chain reaction (PCR), with the first 90 base pairs omitted (resulting in a -30 residue N-  
142 terminal truncated protein). Primers used were as follows (with restriction site underlined): Forward  
143 primer        AAAAAAGGATCCGCGCCGGACGAACTCGCC        and        Reverse        primer

144 AAAAAAAAGCTTCAAGCGCCGAAGGCCCG (Eurofins Genomics). Amplicons were purified and cloned  
145 into pET28a using *Bam*HI/*Hin*DIII restriction sites and the sequence was confirmed (Eurofins  
146 Genomics). Bla<sub>Mab</sub> was expressed in *E. coli* BL21 (DE3) cells by addition of 1 mM Isopropyl β-D-1-  
147 thiogalactopyranoside (IPTG) and incubation at 25 °C for 18 h. Bla<sub>Mab</sub> was purified by Immobilised  
148 Metal Affinity Chromatography (IMAC) and dialysed into 25 mM Tris HCl pH 7, 100 mM NaCl.

149

#### 150 **Thin Layer Chromatography (TLC) activity assay**

151 Relebactam (2 mg/mL) was added to recombinant Bla<sub>Mab</sub> (0.01 mg/mL) and incubated for 5 minutes  
152 at room temperature, before addition of Penicillin V (4 mg/mL) for a further 10 minute incubation at  
153 room temperature. Alongside appropriate control reactions (Figure 2), 1 μL of the reaction was  
154 spotted onto aluminium backed silica gel plates (5735 silica gel 60 F<sub>254</sub>, Merck) and dried before being  
155 subjected to Thin Layer Chromatography (TLC) using ethyl acetate:water:acetic acid  
156 (C<sub>4</sub>H<sub>8</sub>O<sub>2</sub>:H<sub>2</sub>O:CH<sub>3</sub>COOH) (3:1:1, v/v/v). Once dry, plates were visualised by being dipped into KMnO<sub>4</sub>  
157 TLC stain with light charring.

158

#### 159 **Spectrophotometric analysis of Bla<sub>Mab</sub> inhibition by Relebactam**

160 Recombinant Bla<sub>Mab</sub> (0.25 nM) was mixed with an increasing concentration of relebactam (0, 0.1, 1,  
161 10 and 100 μM) and 100 μM nitrocefin (Carbosynth, UK). The hydrolysis of nitrocefin was monitored  
162 at 486 nm using a Multiskan Go plate reader (Thermo Scientific). Data points were subsequently  
163 plotted as absorbance at 486 nm vs time using Graphpad Prism 7.

164

165

166

167 **Results:**

168 In this paper we have identified that *M. abscessus* can be sensitised to amoxicillin by the addition of  
169 the non-competitive  $\beta$ -lactamase inhibitor, relebactam. Furthermore we have shown that  
170 meropenem sensitivity can be enhanced by the addition of relebactam. Firstly, we conducted disk  
171 diffusion assays with amoxicillin and meropenem with and without relebactam. Subsequently the  
172 zones of inhibition (ZOI) were measured as a measure of sensitivity. Amoxicillin alone failed to  
173 demonstrate any kind of sensitivity, however the addition of relebactam provided detectable ZOI,  
174 demonstrating the induced sensitivity to amoxicillin by relebactam. A ZOI was visible for meropenem,  
175 however with the incorporation of relebactam, this ZOI was significantly enhanced, suggesting  
176 increased sensitivity upon combination with relebactam (1a). This led us to the hypothesis that  
177 relebactam was inhibiting the *M. abscessus*  $\beta$ -lactamase, Bla<sub>Mab</sub>, preventing hydrolysis of amoxicillin  
178 to the inactive amoxicilloic acid (1b). In order to assess the clinical relevance of these observations,  
179 both amoxicillin and meropenem were tested alone and in combination with relebactam against a  
180 panel of clinical isolates of *M. abscessus* obtained from patients at Brighton and Sussex Medical School  
181 in addition to *M. abscessus* NCTC strain. In all cases, the addition of relebactam sensitised the isolate  
182 to amoxicillin ( $n=3$ ) (1c). The same experiment was conducted with meropenem, and in most cases,  
183 an increase in sensitivity was observed ( $n=3$ ) (1d). All necessary controls were conducted and no ZOI  
184 was observed for relebactam alone.

185

186 In order to further validate our observation, liquid cultures were exposed to increasing concentrations  
187 of amoxicillin and meropenem with and without a dose response of relebactam (1e and 1f  
188 respectively). As a control, relebactam was also tested for inhibitory activity on its own. These cultures  
189 were read every 24 hours using a spectrophotometer at OD<sub>600nm</sub> up to 96 hours. Relebactam at 128  
190  $\mu$ g/mL demonstrated no inhibitory activity, giving a growth profile much the same as the compound-  
191 free control (no drug), confirming that relebactam lacks antibacterial activity against *M. abscessus*.



192 32 µg/mL of amoxicillin appeared to show a moderate enhancement of bacterial growth, however  
 193 when combined with 2 µg/mL of relebactam, this amoxicillin concentration was found to display  
 194 potent antibacterial activity against *M. abscessus*. The same experiment was conducted with  
 195 meropenem, wherein partial growth impairment was observed at 8 µg/mL, however when combined  
 196 with 2 µg/mL relebactam, significant antibacterial activity was observed at this concentration. End  
 197 point statistical analysis was conducted using a t-test to assess the significance of differences between  
 198 cultures with and without relebactam. In both cases, a statistically significant increase in sensitivity  
 199 was observed upon addition of 2 µg/mL of relebactam in combination with amoxicillin or meropenem.  
 200

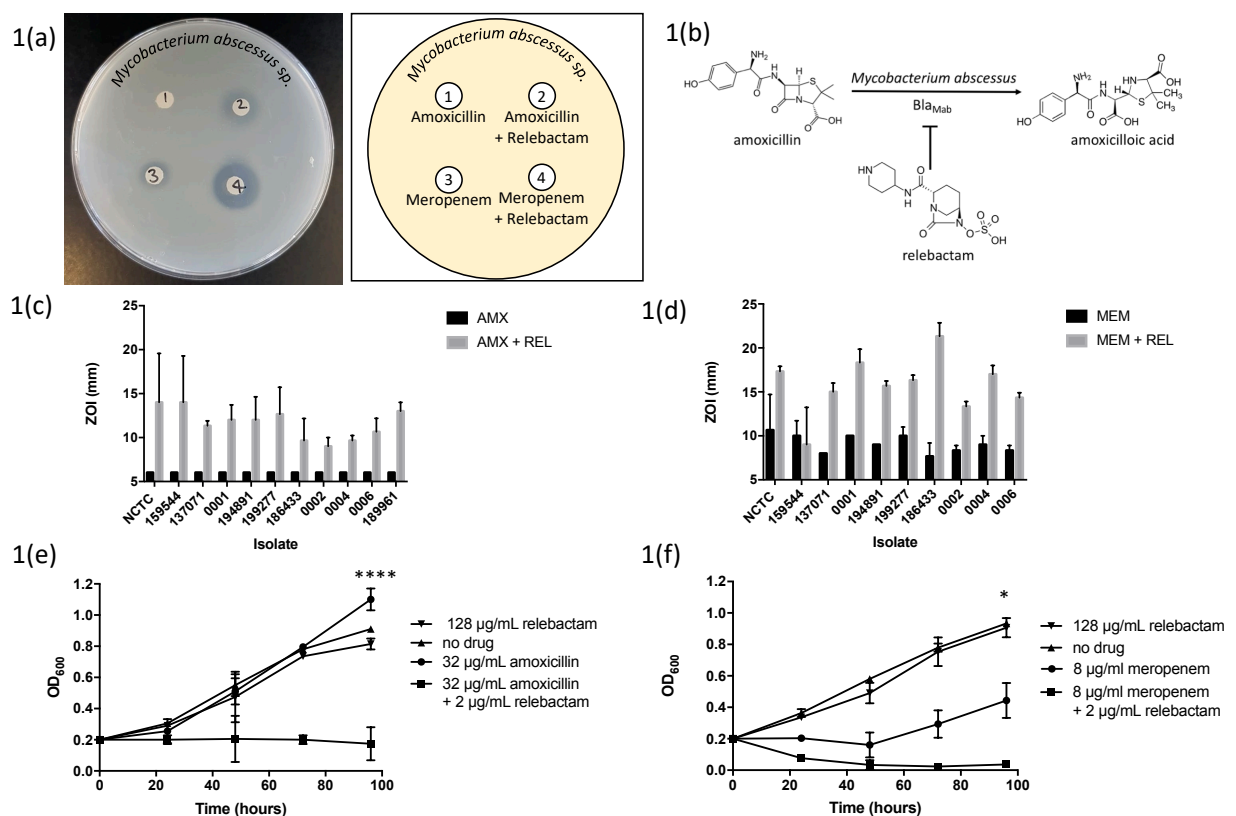

201

202 **Figure 1: Relebactam sensitises *Mycobacterium abscessus* to amoxicillin and improves sensitivity to**  
 203 **meropenem.** A disk diffusion experiment (1a) and corresponding plate map demonstrating enhanced  
 204 sensitivity of *M. abscessus* by zone of inhibition to amoxicillin (1) with the addition of relebactam (2)  
 205 and meropenem (3) with the addition of relebactam (4). The inhibition of *M. abscessus* β-lactamase

206 Bla<sub>Mab</sub> by relebactam is summarised (1b). The disk diffusion experiments were conducted with the  
 207 NCTC *M. abscessus* strain along with a panel of clinical isolates and the diameter of the zones of  
 208 inhibition (ZOI) measured in millimetres. All strains of *M. abscessus* tested were resistant to amoxicillin  
 209 (AMX) alone, however displayed sensitivity with the addition of relebactam (REL) (1c). The same was  
 210 conducted for meropenem (MEM) and likewise, activity was clearly enhanced with the addition of  
 211 relebactam (1d). Growth curves were conducted with *M. abscessus* NCTC in medium containing  
 212 128 µg/mL relebactam and 32 µg/mL amoxicillin with and without relebactam at 2 µg/mL. Growth  
 213 inhibition was only observed with relebactam in combination with amoxicillin (1e). Likewise, the  
 214 inhibitory activity of meropenem was clearly enhanced with the addition of relebactam (1f). A t-test  
 215 was used for end point analysis between samples +/- relebactam and the results were deemed to be  
 216 significant with *p* values of <0.0001 and 0.0152 for amoxicillin and meropenem respectively.

217

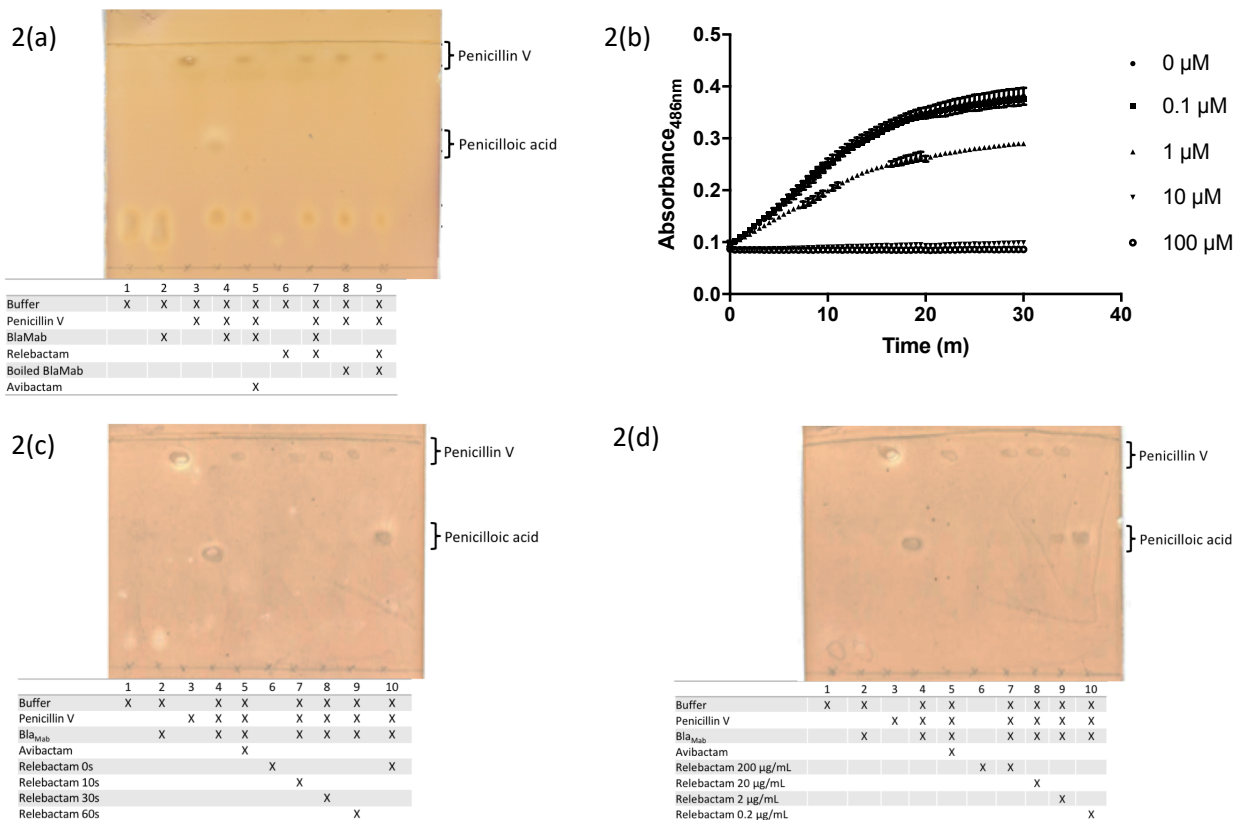

218

219 **Figure 2. Biochemical analysis of relebactam inhibition of *M. abscessus*  $\beta$ -lactamase, Bla<sub>Mab</sub>.** Our  
220 novel Thin Layer Chromatography (TLC) assay (2a) exhibiting the activity of Bla<sub>Mab</sub> in the turnover of  
221 penicillin V (high R<sub>f</sub> value) to penicilloic acid (lower R<sub>f</sub> value). In the absence, or termination of activity  
222 of Bla<sub>Mab</sub> (by boiling (100 °C for 1 h) or addition of known inhibitor avibactam (Lefebvre et al., 2017)  
223 (200 µg/mL) no lower R<sub>f</sub> value spot corresponding to penicilloic acid is seen on the TLC plate. The  
224 addition of relebactam to the reaction between Bla<sub>Mab</sub> and penicillin V also results in the absence of  
225 the lower R<sub>f</sub> value spot, suggesting inhibition of Bla<sub>Mab</sub> (2a). This observed inhibition is validated by a  
226 spectrophotometric analysis, where the turnover of nitrocefin (100 µM) by Bla<sub>Mab</sub> (0.25 nM) was  
227 monitored at 486 nm with a varying concentration of relebactam (0, 0.1, 1, 10 and 100 µM). The  
228 increase in concentration of relebactam resulted in partial inhibition of nitrocefin turnover at 1 µM  
229 and total abrogation at 10 µM (2b). This inhibitory activity was seen within 10 seconds of pre-  
230 incubation of relebactam with Bla<sub>Mab</sub>, before addition of penicillin V, in a time course TLC assay.  
231 However, the addition of relebactam at the same time (t=0) as penicillin V resulted in a lack of  
232 inhibitory activity (2c). The minimum concentration of relebactam required for inhibition of Bla<sub>Mab</sub> in  
233 the TLC activity assay was assessed using a range of concentrations (200, 20, 2 and 0.2 µg/mL). Activity  
234 of Bla<sub>Mab</sub> was maintained below a relebactam concentration of 2 µg/mL in the TLC activity assay,  
235 suggesting a minimal concentration of relebactam required to inhibit Bla<sub>Mab</sub> in the assay is within the  
236 range of 20 to 2 µg/mL (2d).

237

238 In order to validate the inhibitory activity observed phenotypically in Figure 1, we conducted  
239 biochemical analysis of the activity of relebactam on the *M. abscessus* endogenous  $\beta$ -lactamase,  
240 Bla<sub>Mab</sub>. The gene was amplified by PCR, digested, ligated into pET28a and sequenced, before  
241 transformation into chemically competent *E. coli* BL21. Bla<sub>Mab</sub> was expressed, cells harvested and the  
242 enzyme purified by IMAC. We subsequently devised a novel TLC-based assay for assessing  $\beta$ -  
243 lactamase activity by separating the penicillin V substrate from the penicilloic acid product. This assay

244 enabled us to demonstrate the  $\beta$ -lactamase activity of our purified Bla<sub>Mab</sub>, as well as assay the efficacy  
245 of inhibitors against the enzyme (2a). We used avibactam as a positive control, as its inhibitory activity  
246 against Bla<sub>Mab</sub> has previously been described by Lefebvre et al. 2017. Lane 1 contained protein  
247 purification buffer only, and lane 2 had the addition of enzyme (0.01 mg/ml). Following  
248 chromatography, two lower spots are observed in lanes 1 and 2, indicative of buffer. Penicillin V was  
249 added to lane 3 and gave a characteristic spot of high R<sub>f</sub> value, demonstrating unhydrolysed penicillin  
250 resulted in a spot just below the solvent front. Lane 4 was identical to lane 3 with the addition of Bla<sub>Mab</sub>  
251 protein. The hydrolysis of penicillin V to penicilloic acid by Bla<sub>Mab</sub> resulted in a spot with reduced R<sub>f</sub>  
252 value. The pre-incubation of enzyme with avibactam in lane 5 resulted in a loss of the lower penicilloic  
253 acid spot, demonstrating the inhibition of Bla<sub>Mab</sub> activity. In lane 6, relebactam alone did not resolve  
254 on the TLC, but its pre-incubation with Bla<sub>Mab</sub> before addition to the penicillin substrate in lane 7  
255 resulted in total inhibition of hydrolysis as observed with avibactam (lane 5). Finally, the inhibition of  
256 Bla<sub>Mab</sub> is further validated by the repeat of lane 4 and lane 7 conditions with heat-denatured Bla<sub>Mab</sub>  
257 (lanes 8 and 9 respectively). This result confirms the direct inhibition of Bla<sub>Mab</sub> by relebactam ( $n=5$ ).

258

259 We further validated this result by using a commercially available  $\beta$ -lactamase substrate, nitrocefin,  
260 which is selectively hydrolysed by  $\beta$ -lactamases, resulting in an increase in absorbance at 486 nm. By  
261 pre-incubating Bla<sub>Mab</sub> enzyme with a dose response of relebactam (from 0-100  $\mu$ M), before initiation  
262 of the absorbance assay with the addition of nitrocefin substrate, we observed partial inhibition at  
263 1  $\mu$ M (0.348  $\mu$ g/mL) and a complete loss of activity at 10  $\mu$ M (3.48  $\mu$ g/mL), confirming the direct  
264 inhibitory activity of relebactam on Bla<sub>Mab</sub> (2b).

265

266 Our TLC-based  $\beta$ -lactamase assay enabled us to further explore the parameters of the inhibitory  
267 activity of relebactam by varying the time of pre-incubation of relebactam with Bla<sub>Mab</sub> (2c) and the  
268 minimum inhibitory concentration required to abrogate catalytic turnover of the penicillin V substrate

269 to the penicilloic acid substrate (2d). We found that penicillin V turnover was rapid and that only  
270 addition of relebactam at the same time as the substrate demonstrated turnover of penicillin V,  
271 suggesting non-competitive, irreversible inhibition of Bla<sub>Mab</sub> by relebactam. The dose response of  
272 relebactam demonstrated total inhibition down to 20 µg/mL, and activity of Bla<sub>Mab</sub> was maintained  
273 below a relebactam concentration of 2 µg/mL. This suggested a minimal concentration of relebactam  
274 required to inhibit Bla<sub>Mab</sub> in the assay is within the range of 20 to 2 µg/mL. This corresponds to less  
275 than or equal to 100 fold stoichiometric excess of relebactam required to completely inhibit Bla<sub>Mab</sub>  
276 (0.5 µM BlaMab to 57.5 µM relebactam corresponding to 20 µg/mL).

277

## 278 **Discussion:**

279 In this paper we have demonstrated the inhibitory activity of the non-β-lactam based β-lactamase  
280 inhibitor, relebactam against *M. abscessus* endogenous β-lactamase, Bla<sub>Mab</sub>. Alone, this is not  
281 sufficient to kill *M. abscessus*, however its use as part of a combination opens up considerable  
282 therapeutic potential. We have identified that a low concentration of relebactam co-administration is  
283 capable of sensitising *M. abscessus* NCTC and clinical isolates to amoxicillin, well within the  
284 therapeutic range for this versatile and widely available antibiotic. Furthermore, we demonstrate  
285 relebactam provides a significant increase in inhibitory activity of meropenem, a mainstay of *M.*  
286 *abscessus* clinical intervention. Our study introduces a completely novel TLC-based β-lactamase  
287 inhibition assay, validated with the commercially available and widely used nitrocefin assay, to  
288 investigate the parameters of relebactam's inhibitory activity. Relebactam is currently in phase III  
289 clinical trial for administration in combination with imipenem, another mainstay in *M. abscessus* front  
290 line chemotherapy. Our findings therefore represent a timely and highly impactful discovery that is  
291 likely to be translatable into the clinical setting.

292

293

294 **Author Contributions:**

295 R. C. L., J. H., M. D., P. L. and J. A. G. C. intellectually conceived and designed the experiments. R. C. L.,  
296 J. H. and J. A. G. C. conducted the experiments. R. C. L., J. H. and J. A. G. C. wrote the manuscript.

297

298 **Funding:** This research was funded by Birmingham Women's and Children's Hospital Charity Research  
299 Foundation (BWCHCRF) (R. C. L. 50% PhD Studentship, match funded by Aston University Prize  
300 Scheme) and the Academy of Medical Sciences and Global Challenges Research Fund with a  
301 Springboard Grant (SBF003\1088:).

302

303 **Acknowledgements:** J. A. G. C. is grateful to the Academy of Medical Sciences, Global Challenges  
304 Research Fund and Birmingham Women's and Children's Hospital Charity Research Foundation  
305 (BWCHCRF) for their continued support of the Mycobacterial Research Group at Aston University. The  
306 *Mycobacterium abscessus* clinical isolates used in this study were provided by Dr Simon Waddell,  
307 Brighton and Sussex Medical School.

308

309 **References:**

310 Amit Kaushik, Nicole C. Ammerman, Jin Lee, Olumide Martins, Barry N. Kreiswirth, Gyanu  
311 Lamichhane, Nicole M. Parrish, Eric L. Nuermberger (2019). In vitro activity of the new  $\beta$ -  
312 lactamase inhibitors relebactam and vaborbactam in combination with  $\beta$ -lactams against  
313 *Mycobacterium abscessus* complex clinical isolates. Antimicrob. Agents Chemother.  
314 doi:10.1128/AAC.02623-18

315 Bryant, JM, et al. 2013 *Whole-genome sequencing to identify transmission of Mycobacterium*  
316 *abscessus* between patients with cystic fibrosis: a retrospective cohort study. The Lancet, Vol.

- 317 381, pp. 1551-1560.
- 318 Elizabeth Story-Roller, Emily C. Maggioncalda, Gyanu Lamichhane Select  $\beta$ -lactam  
319 combinations exhibit synergy against *Mycobacterium abscessus in vitro*. Antimicrobial  
320 Agents and Chemotherapy Feb 2019, AAC.02613-18; DOI: 10.1128/AAC.02613-18
- 321 Fitzgerald, DA, et al. 1995. *Cutaneous infection with Mycobacterium abscessus.*, Journal of  
322 Dermatology, Vol. 132, pp. 800-804.
- 323 Griffith DE. 2014. Mycobacterium abscessus subsp abscessus lung disease: 'trouble ahead,  
324 trouble behind. . .' F1000prime Rep 6:107. <https://doi.org/10.12703/P6-107>.
- 325 Griffith, DE, et al. 2007. *An Official ATS/IDSA Statement: Diagnosis, Treatment, and*  
326 *Prevention of Nontuberculous Mycobacterial Diseases.* 4, ATS Journals, Vol. 175.
- 327 Haworth, CS, et al. 2017. *British Thoracic Society Guideline for the management of non-*  
328 *tuberculous mycobacterial pulmonary disease (NTM-PD).* BMJ Open Respiratory Research,  
329 Vol. 4, pp. 676 1-12.
- 330 Katiany R. Caleffi-Ferracioli, Flaviane G. Maltempe, Vera Lúcia D. Siqueira, Rosilene F.  
331 Cardoso. 2013. Fast detection of drug interaction in *Mycobacterium tuberculosis* by a  
332 checkerboard resazurin method, Tuberculosis, Volume 93, Issue 6, Pages 660-663, ISSN  
333 1472-9792, <https://doi.org/10.1016/j.tube.2013.09.001>.
- 334 Kehrman J, Kurt N, Rueger K, Bange F-C, Buer J. 2016. GenoType NTM- DR for identifying  
335 *Mycobacterium abscessus* subspecies and determining molecular resistance. J Clin Microbiol  
336 54:1653–1655. doi:10.1128/JCM.00147-16.
- 337 Lefebvre A-L, Le Moigne V, Bernut A, Veckerlé C, Compain F, Herrmann J-L, Kremer L, Arthur  
338 M, Mainardi J-L. 2017. Inhibition of the  $\beta$ -lactamase Bla by avibactam improves the *in vitro*

- 339 and *in vivo* efficacy of imipenem against *Mycobacterium abscessus*. *Antimicrob Agents*  
340 *Chemother* 61:e02440-16. [https://doi.org/ 10.1128/AAC.02440-16](https://doi.org/10.1128/AAC.02440-16).
- 341 Leung, J., and Olivier, K. 2013. Nontuberculous mycobacteria in patients with cystic fibrosis.  
342 *Semin Respir Crit Care Med.* 34(1):124
- 343 Lopeman, R.C.; Harrison, J.; Desai, M.; Cox, J.A.G. *Mycobacterium abscessus*: Environmental  
344 Bacterium Turned Clinical Nightmare. *Preprints* 2019, 2019010273 (doi:  
345 10.20944/preprints201901.0273.v1).
- 346 Moore, M and Frerichs, JB. 1953. *An Unusual Acid-Fast Infection of the Knee with*  
347 *Subcutaneous, Abscess-Like Lesions of the Gluteal Region. 2*, *Journal of Investigative*  
348 *Dermatology*, Vol. 20.
- 349 Nessar R, Cambau E, Reyrat JM, Murray A, Gicquel B. 2012. Mycobacte- rium abscessus: a  
350 new antibiotic nightmare. *J Antimicrob Chemother* 67:810–818.  
351 <https://doi.org/10.1093/jac/dkr578>.
- 352 Pandey R, Chen L, Manca C, Jenkins S, Glaser L, Vinnard C, Stone G, Lee J, Mathema B,  
353 Nuermberger EL, Bonomo RA, Kreiswirth BN. 2019. Dual  $\beta$ -lactam combinations highly active  
354 against *Mycobacterium abscessus* complex *in vitro*. *mBio* 10:e02895-18. [https://](https://doi.org/10.1128/mBio.02895-18)  
355 [doi.org/10.1128/mBio.02895-18](https://doi.org/10.1128/mBio.02895-18).
- 356 Petrini B. 2006. *Mycobacterium abscessus*: an emerging rapid-growing potential pathogen.  
357 *APMIS* 114:319–328. [https://doi.org/10.1111/j.1600-0463.2006.apm\\_390.x](https://doi.org/10.1111/j.1600-0463.2006.apm_390.x).
- 358 Soni, I., De Groote, M., Dasgupta, A., and Chopra, S. 2016. Challenges facing the drug  
359 discovery pipeline for non-tuberculous mycobacteria. *J Med Microbiol.* 65(1):1-8



360 Soroka D, Dubee V, Soulier-Escrihuela O, Cuinet G, Hugonnet JE, Gutmann L, Mainardi JL,  
361 Arthur M. 2014. Characterization of broad-spectrum Mycobacterium abscessus class A beta-  
362 lactamase. J Antimicrob Chemother 69:691–696. <https://doi.org/10.1093/jac/dkt410>.

363 Tortoli, E, Kohl, TA and Brown-Elliot, BA. 2016. *Emended description of Mycobacterium*  
364 *abscessus*, *Mycobacterium abscessus* subsp. *abscessus* and *Mycobacterium abscessus* subsp.  
365 *bolletii* and designation of *Mycobacterium abscessus* subsp. *massiliense* comb. nov.,  
366 International Journal of Systematic and Evolutionary Microbiology, Vol. 66, pp. 4471-4479.

367 Wayne, PA et al. 2012. CLSI. Methods for Dilution Antimicrobial Susceptibility Tests for  
368 Bacteria That Grow Aerobically; Approved Standard – Ninth Edition. CLSI document M07-A9:  
369 Clinical and Laboratory Standards Institute.

1(a)

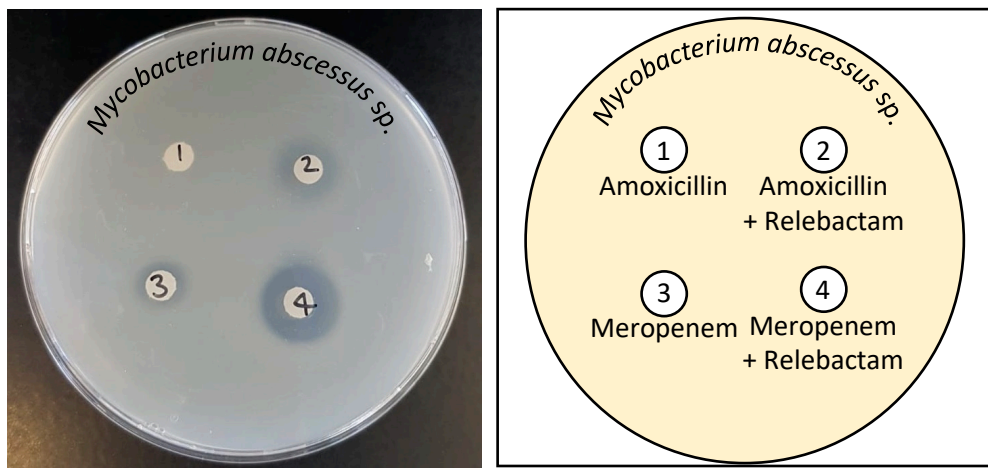

1(b)

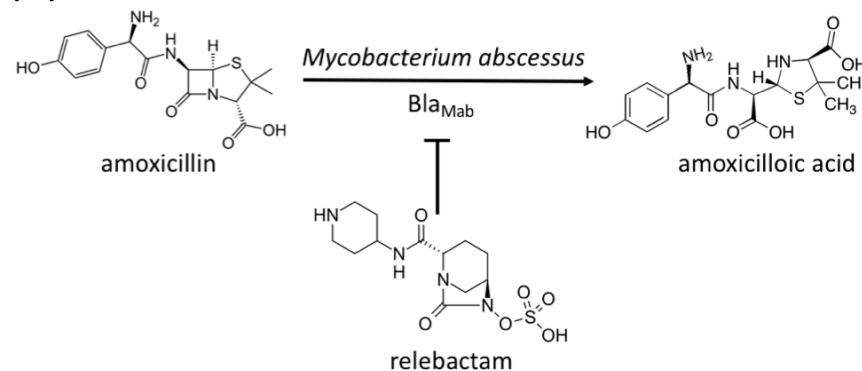

1(c)

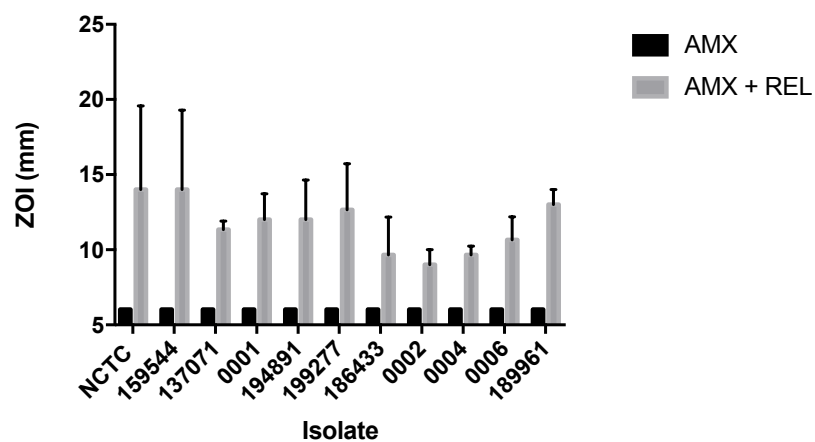

1(d)

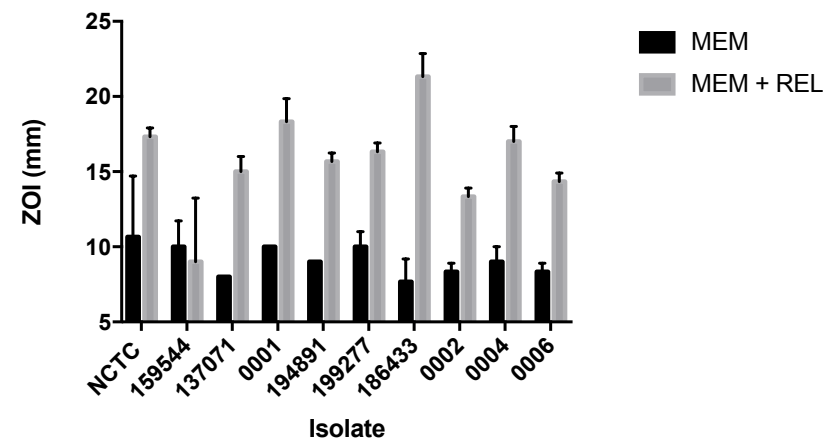

1(e)

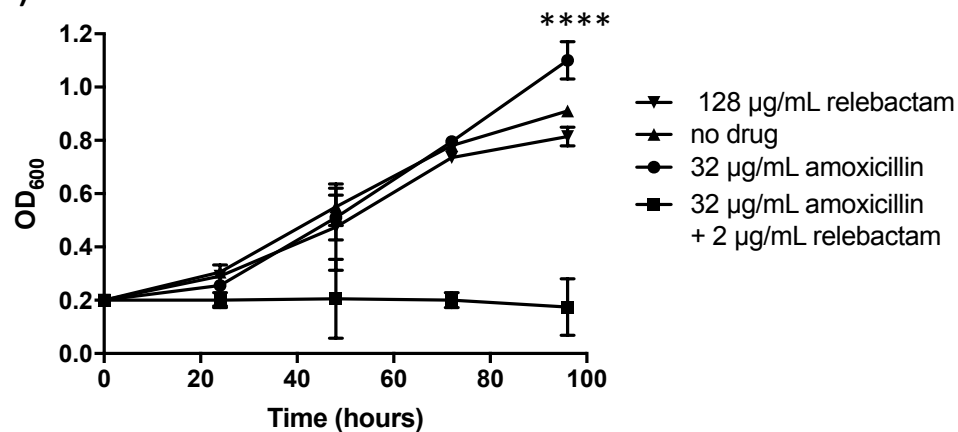

1(f)

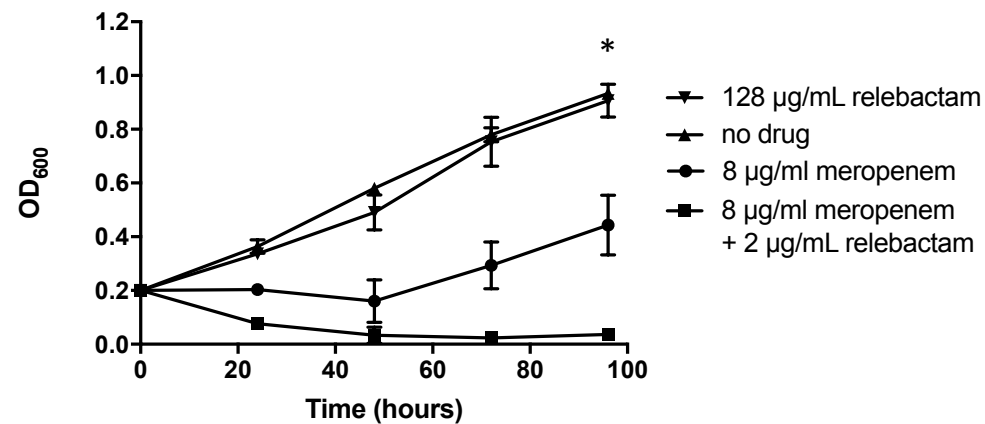

Source: https://www.biorxiv.org/content/biorxiv/early/2019/02/28/563189.full.pdf
